# Supplementary material for: Prevalence of spine pain among Tunisian children and adolescents and related factors
Source: PubMed Central journal article supplement — Pediatr Rheumatol Online J. 2024 Sep 9;22:84. doi: 10.1186/s12969-024-01007-w (PMC11386316; doi:10.1186/s12969-024-01007-w), 2024-09-09
Supplement: 12969_2024_1007_MOESM1_ESM.pdf [file 12969_2024_1007_MOESM1_ESM.pdf]

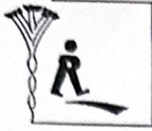

Hôpital Mongi Slim  
2046 Sidi Daoud  
La Marsa – Tunisie

# HÔPITAL MONGI SLIM

## Service de Rhumatologie

### Chef de Service

Pr. Ahmed Laatar

Direct: (216) 70 109 179  
Fax: (216) 70 109 120  
E mail: laatar.ahmed@rns.tn

### Adjoints

Pr. Kaouther Ben Abdelghani  
Professeur en Rhumatologie  
kaouther.ben.abdelghani@fmt.utm.tn  
Poste: 171

Dr. Selma Chékili  
Médecin Spécialiste Major  
E mail: selma.chekili@rns.tn  
Poste: 173

Dr. Selma Kassab  
Médecin Spécialiste Principal Major  
E mail: selma.kassab@rns.tn

Dr. Alia Façaa  
Professeur Agrégée  
E mail: aliafaçaa@fmt.utm.tn  
Poste: 170

Dr. Saoussen Miladi  
Assistante hospitalo-universitaire  
E mail: saoussen.miladi@fmt.utm.tn  
Poste: 172

Dr. Leila Souabni  
Médecin Spécialiste Principal  
E mail: leila.souabni@rns.tn

Dr. Hiba Boussaa  
Assistante hospitalo-universitaire  
E mail: hibaboussaa@gmail.com  
Poste: 173

Dr. Yasmine Makhlouf  
Assistante hospitalo-universitaire  
E mail: yasmine.makhlouf@gmail.com  
Poste: 173

Dr. Kmar Ouenniche  
Médecin Spécialiste Principal Major  
E mail: ouennichekmar@hotmail.fr  
Poste: 172

Dr. Atef Snani  
Consultant en Podologie

Dr. Meriam Ridene  
Échographie

### Accueil

Poste: 176

### Secrétariat

Poste: 5555

### Surveillant

Poste: 174

### Consultations

Poste: 612-624.

### Hôpital de jour

Poste: 5570

### Hospitalisation

Poste: 177

### Echographie

Poste: 5561

### Densitométrie osseuse

Poste: 5562

### Kinésithérapie

Poste: 5568

Tunis, November 30<sup>th</sup> 2023

Subject: Request for APC Waiver

Dear Editors,

I hope this email finds you well. My co-authors and I are rheumatologists in the Rheumatology department of Mongi Slim Hospital, Tunisia. We are writing to request an APC waiver for our manuscript titled "Prevalence of spine pain among Tunisian children and adolescents and related factors" which we have submitted to Pediatric Rheumatology in the PAFLAR special issue (Context Specific Pediatric Rheumatology, Care-Lessons from Africa).

We live in Tunisia, an underdeveloped country. The research field here is struggling to gain a foothold particularly in the aftermath of the sanitary crisis and the economic challenges confronting our nation. Unfortunately, due to these economic constraints, we have no funding and thus, it is challenging for researchers like us to cover the cost of the APC.

Our study holds significant importance in shedding light on the prevalence of neck and back pain among the younger population and its associated risk factors, particularly within the Tunisian context.

The prevalence of back and neck pain in children and adolescents is a matter of growing concern worldwide, and understanding its prevalence and risk factors is crucial for early intervention and prevention. Our study aimed to address this concern by conducting a comprehensive investigation into the prevalence of neck and back pain among children and adolescents aged 6 to 18 years in Tunisia.

We are committed to contributing valuable research to the academic community, and we believe that our work aligns with the goals and scope of your journal. However, the financial barriers we face pose a significant challenge in ensuring the publication of our research.

We kindly request your support in providing an APC waiver for our manuscript.

We appreciate your consideration of our request and understand that resources are limited. Nevertheless, we are hopeful that an APC waiver would enable researchers from underdeveloped countries like ours to contribute meaningfully to the scholarly community.

Thank you for your time and attention to this matter.  
I look forward to your response.

Sincerely,

Ines Cherif  
corresponding author

Pr Ahmed Laatar  
Head of the rheumatology department  
Mongi Slim Hospital, Tunisia

Pr. Ahmed LAATAR  
Chef de Service  
Hôpital Mongi Slim La Marsa
